# Supplementary material for: Therapeutic targeting of circ‐CUX1/EWSR1/MAZ axis inhibits glycolysis and neuroblastoma progression
Source: PubMed Central journal article supplement (PMC6895612; doi:10.15252/emmm.201910835), 2019-11-11
Supplement: EMMM-11-e10835-s002.pdf [file EMMM-11-e10835-s002.pdf]

## Expanded View Figures

**Figure EV1. Identification and expression levels of *circ-CUX1*.**

- A Flowchart delineating the discovery of *circ-CUX1* from tumor tissues and cell lines. FAM, normal fetal adrenal medulla.
- B RT-PCR assay with divergent primers showing the detectable circRNAs of correct size (asterisks) in IMR32 cells.
- C Real-time qRT-PCR assay indicating the circRNA levels in FAM ( $n = 13$ ) and NB tissues ( $n = 20$ ). Student's *t*-test,  $*P < 0.05$  versus FAM.
- D Dual-luciferase assay showing transactivation activity of CUX1 in IMR32 and SH-SY5Y cells transfected as indicated ( $n = 5$ ). Student's *t*-test, one-way ANOVA,  $*P < 0.05$  versus empty vector (mock) or scramble shRNA (sh-Scb).
- E Real-time qRT-PCR assay indicating *circ-CUX1* levels (normalized to  $\beta$ -actin) in NB tissues ( $n = 54$ ). Bars are means and whiskers show min to max. Student's *t*-test.
- F Kaplan–Meier curve showing overall survival of 54 NB patients with low or high *circ-CUX1* levels (cutoff value = 10.77). Log-rank test.
- Data information: Data are presented as mean  $\pm$  SEM. Exact *P* values are specified in Appendix Table S4.

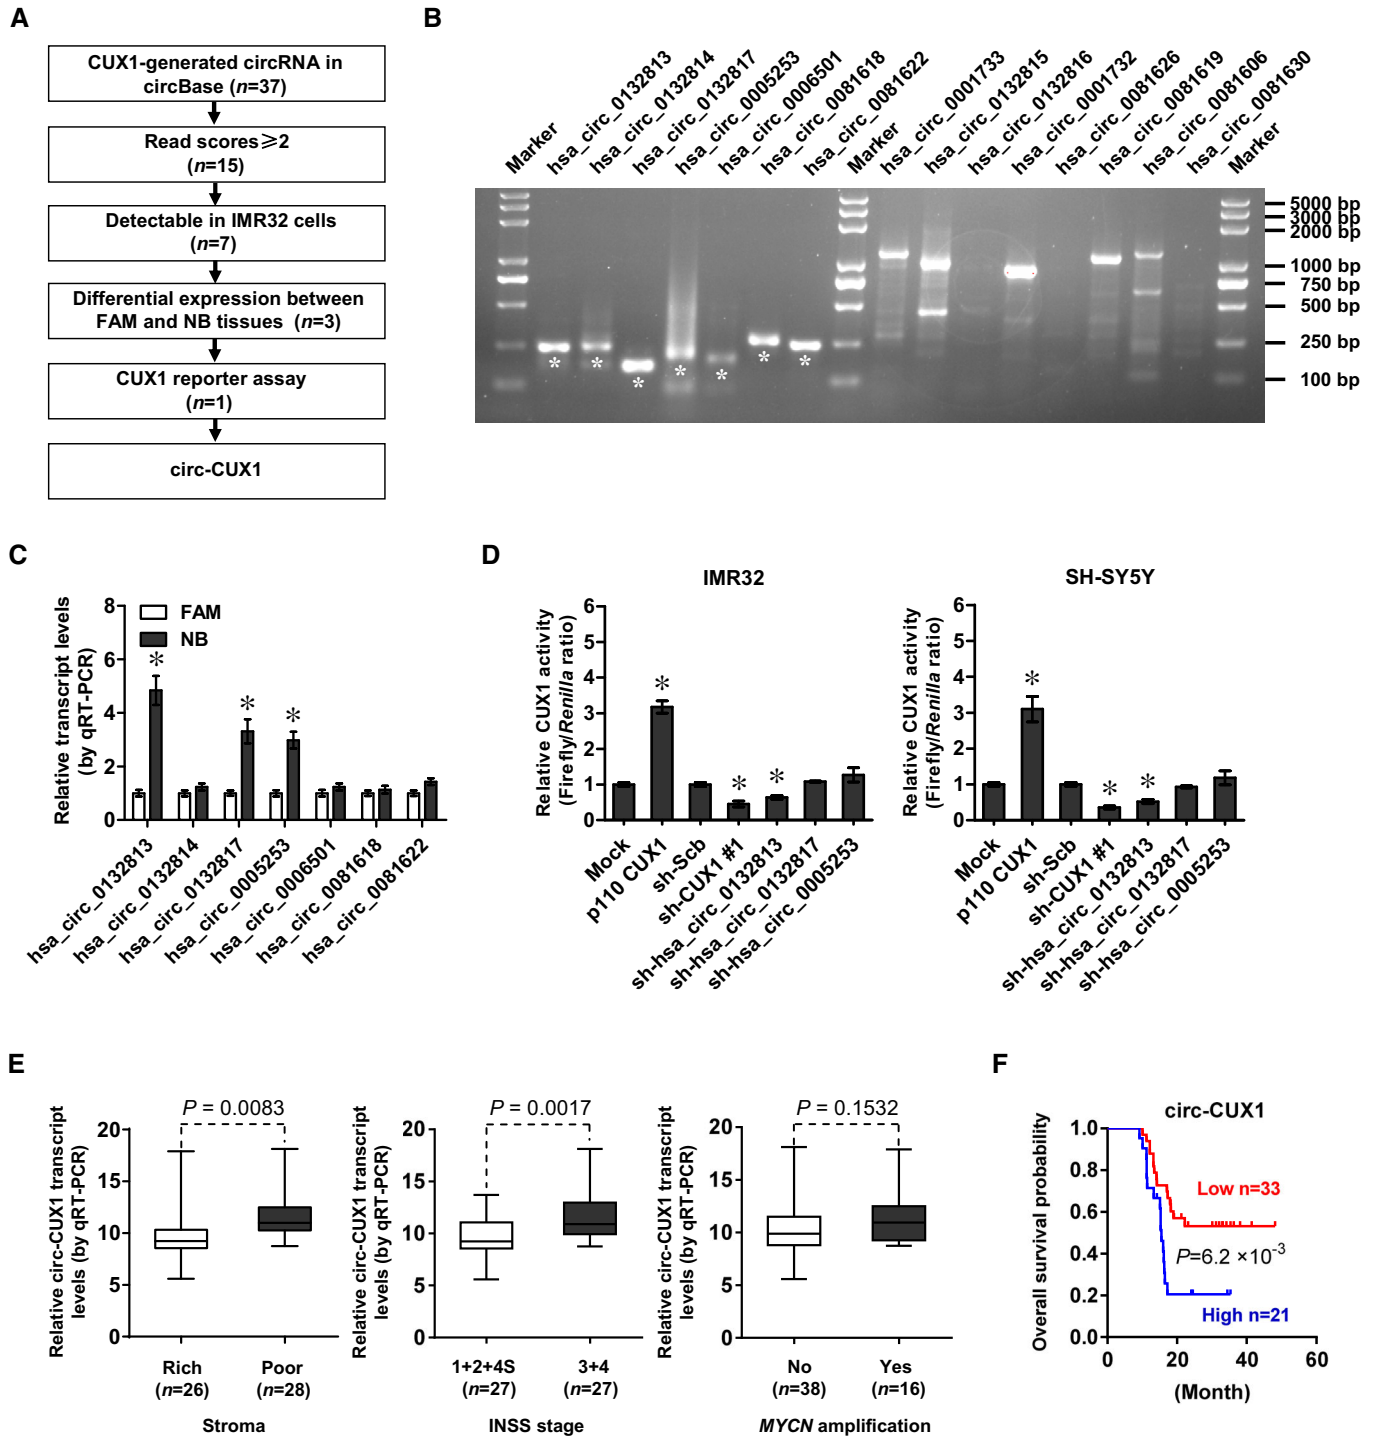

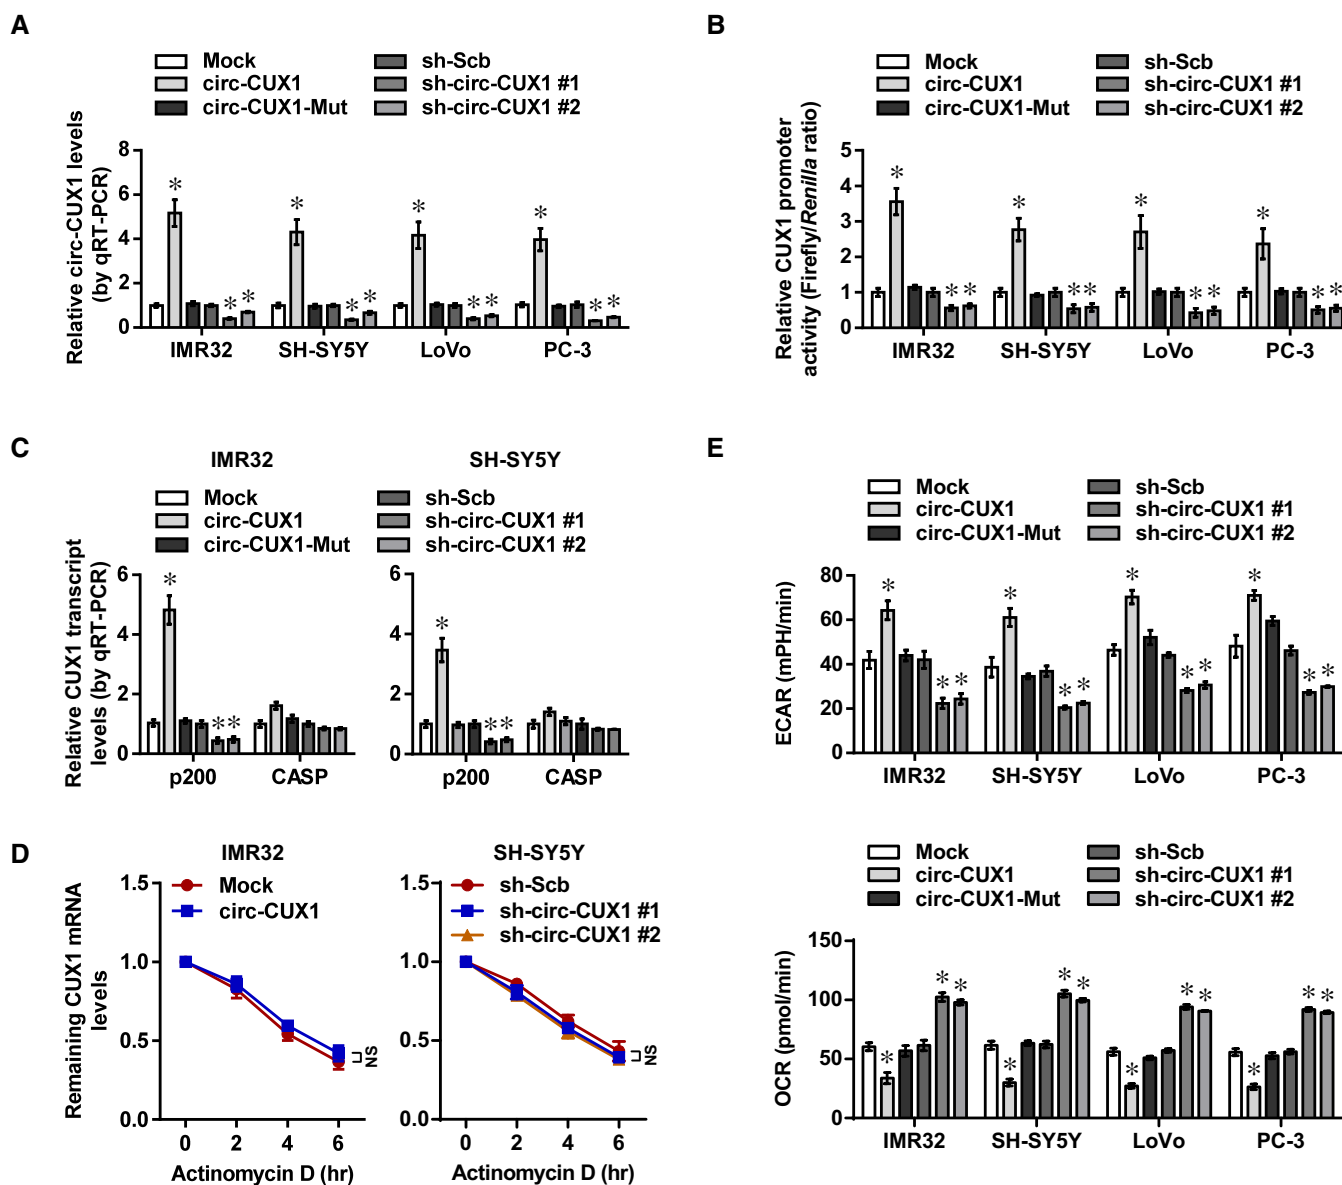

**Figure EV2. *Circ-CUX1* facilitates *CUX1* transcription and aerobic glycolysis of tumor cells.**

- A Real-time qRT-PCR assay indicating expression of *circ-CUX1* (normalized to  $\beta$ -actin) in IMR32, SH-SY5Y, LoVo, or PC-3 cells stably transfected as indicated ( $n = 5$ ). One-way ANOVA,  $*P < 0.05$  versus empty vector (mock) or scramble shRNA (sh-Scb).
- B Dual-luciferase assay showing the activity of *CUX1* promoter in IMR32, SH-SY5Y, LoVo, or PC-3 cells stably transfected as indicated ( $n = 5$ ). One-way ANOVA,  $*P < 0.05$  versus mock or sh-Scb.
- C Real-time qRT-PCR assay indicating expression of *CUX1* isoforms (normalized to  $\beta$ -actin) in IMR32 and SH-SY5Y cells stably transfected as indicated ( $n = 5$ ). One-way ANOVA,  $*P < 0.05$  versus empty vector (mock) or scramble shRNA (sh-Scb).
- D Real-time qRT-PCR assay indicating *CUX1* mRNA levels in IMR32 and SH-SY5Y cells stably transfected as indicated ( $n = 5$ ), and those treated with actinomycin D ( $5 \mu\text{g ml}^{-3}$ ). One-way ANOVA, NS: non-significant.
- E Seahorse extracellular flux assay showing ECAR and OCR in IMR32, SH-SY5Y, LoVo, or PC-3 cells stably transfected as indicated ( $n = 6$ ). One-way ANOVA,  $*P < 0.05$  versus mock or sh-Scb.

Data information: Data are presented as mean  $\pm$  SEM. Exact  $P$  values are specified in Appendix Table S4.
